# Supplementary material for: Octogenarians’ Breast Cancer Is Associated with an Unfavorable Tumor Immune Microenvironment and Worse Disease-Free Survival
Source: MDPI journal article supplement (doi:10.3390/cancers13122933), 2021-06-11
Supplement: s1 [file s1]

# Supplementary Material: Octogenarians' Breast Cancer Is Associated with an Unfavorable Tumor Immune Microenvironment and Worse Disease-Free Survival

Maiko Okano, Masanori Oshi, Swagoto Mukhopadhyay, Qianya Qi, Li Yan, Itaru Endo, Toru Ohtake and Kazuaki Takabe

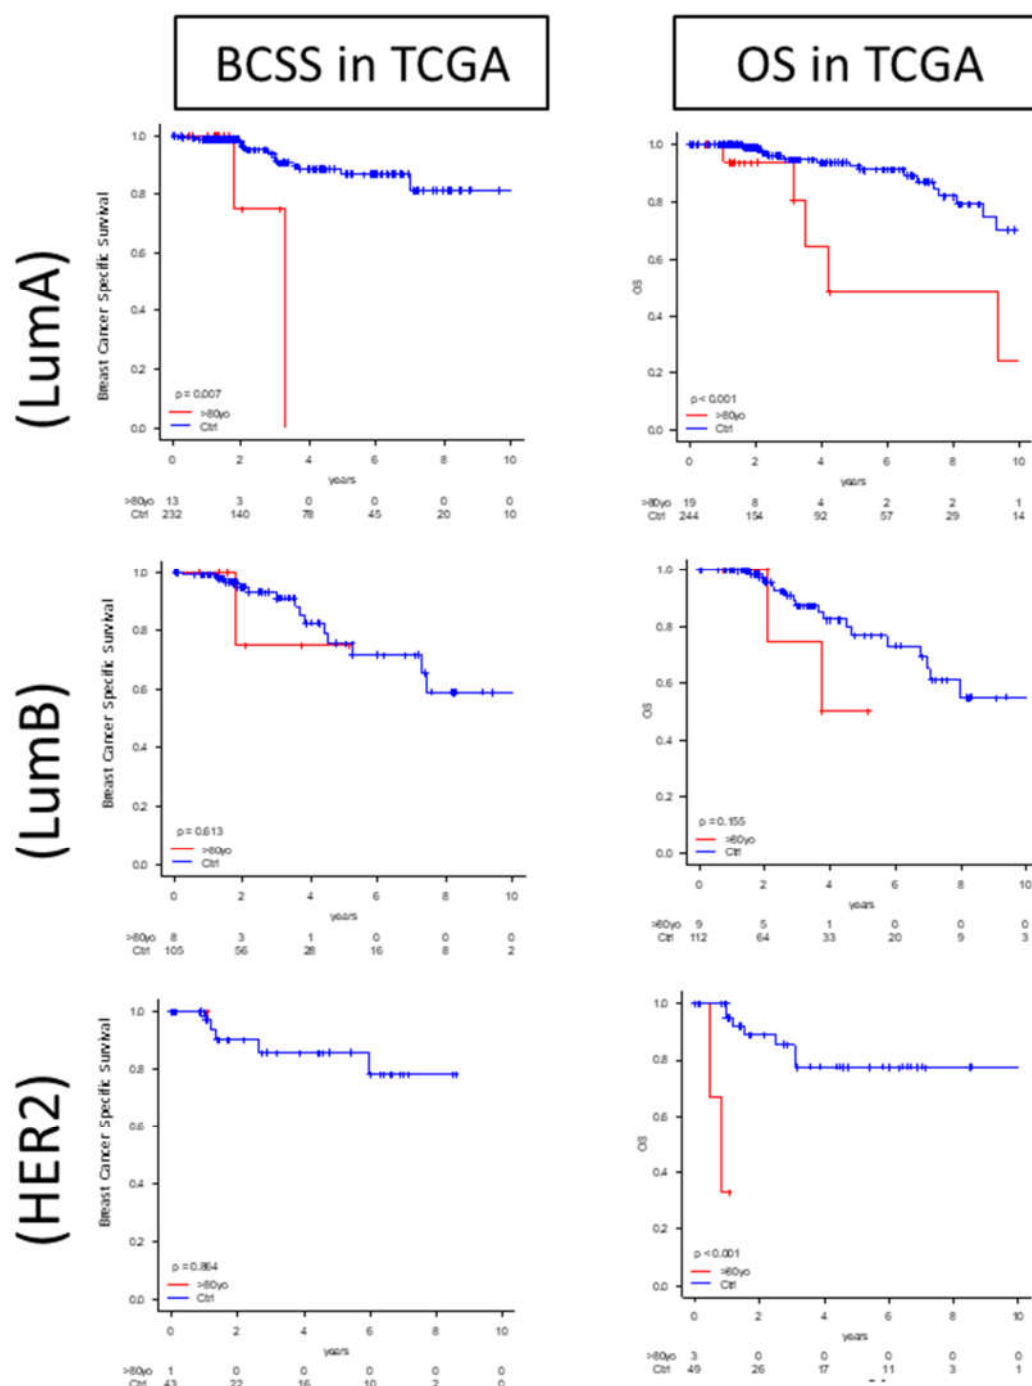

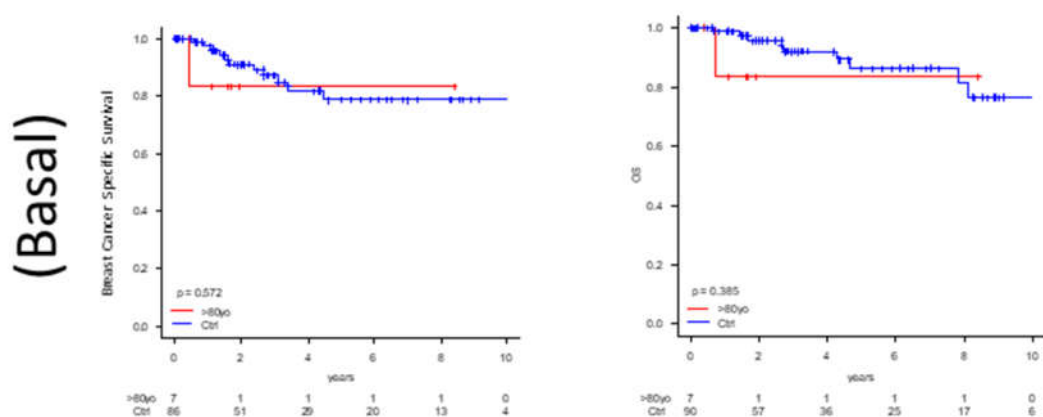

**Figure S1.** Kaplan–Meier survival curves of breast cancer specific survival (BCSS) and overall survival (OS) analyses between the Octogenarian (red line) and the control group (blue line) by subtypes in TCGA cohort.

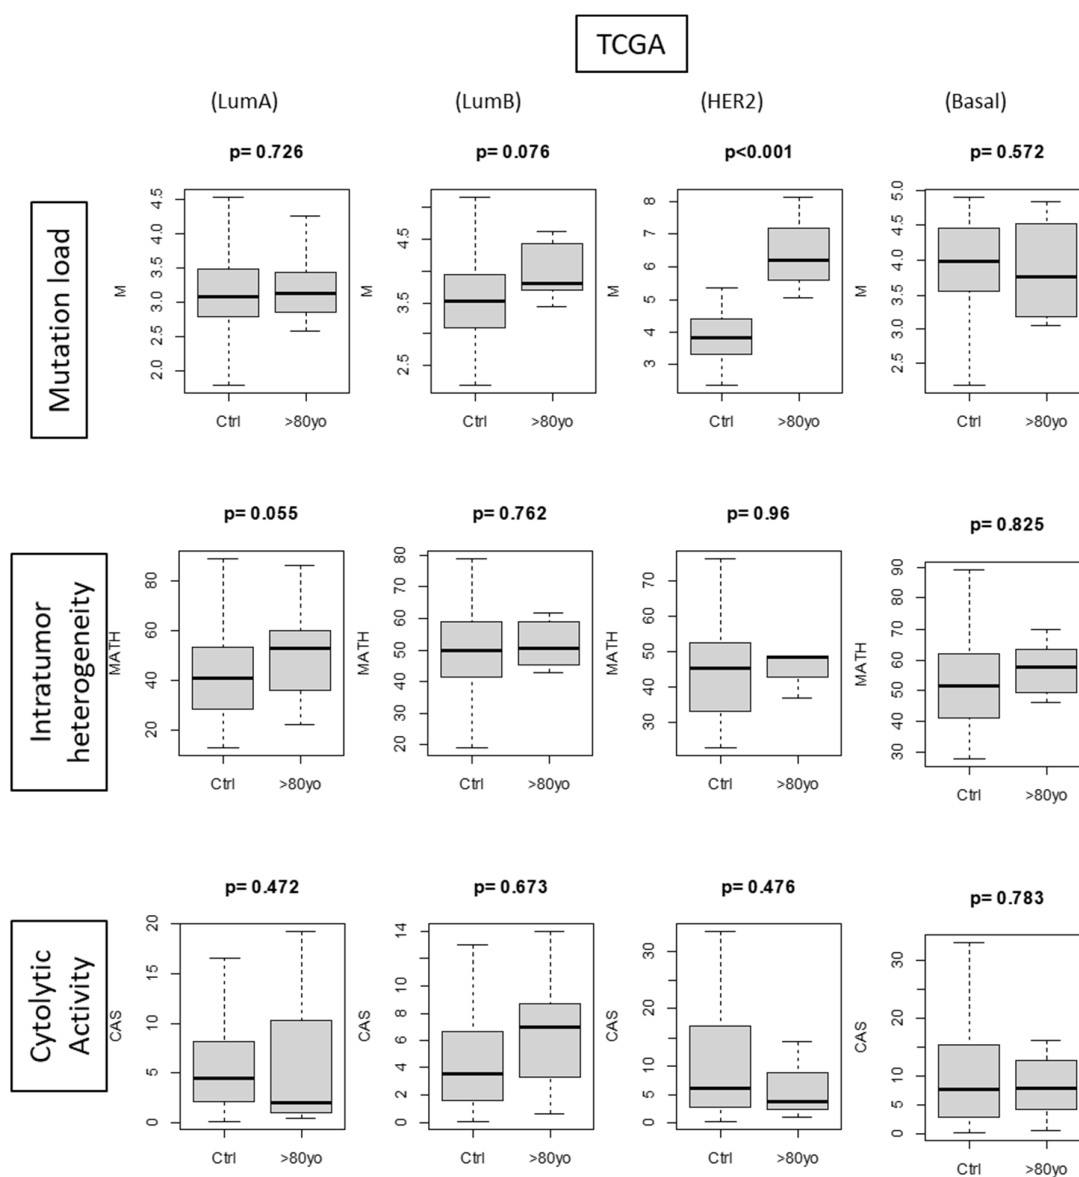

**Figure S2.** Boxplots of comparison of the control group and the Octogenarians in mutation load, Intratumor heterogeneity (MATH score), and Cytolytic Activity Score (CYT) by the subtypes in TCGA cohort.

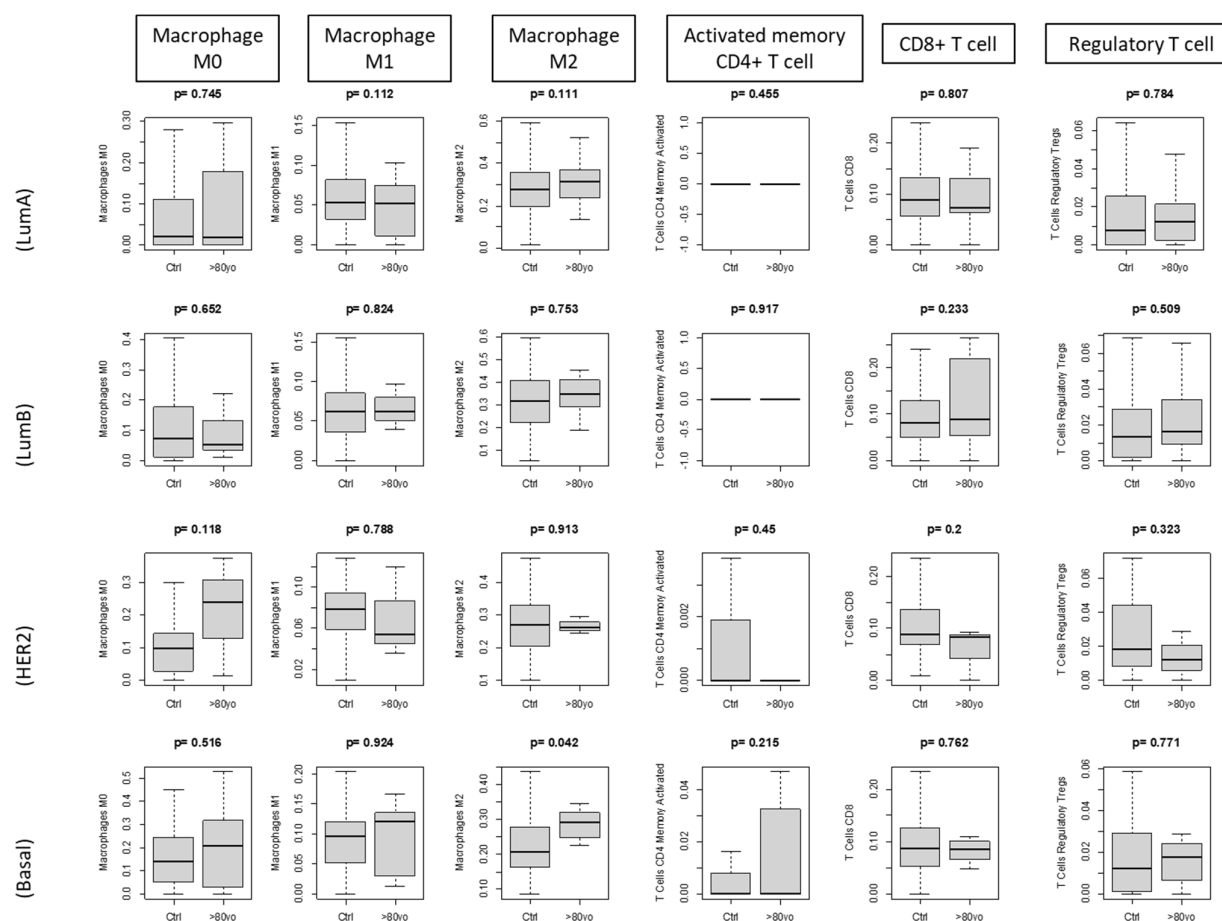

**Figure S3.** Fraction of Macrophage (M0), M1, M2 activated memory CD4 T cell, CD8 T cell and Regulatory T cell in control group and Octogenarian by the subtypes in TCGA cohort.
